# Supplementary material
Source: publisher site journal article supplement (https://www.dovepress.com/article/331442)

**Supplementary Materials**

# **Supplementary Table 1:** ICD codes for OUD diagnosis:

| Disease | ICD-9-CM | ICD-10-CM |
| --- | --- | --- |
| OUD Diagnosis | 292.0, 292.81, 292.84, 292.85, 292.89, 304.00, 304.01, 304.02,  04.03, 304.70, 304.71, 304.72, 304.73, 305.50, 305.51, 305.52,  305.53, E9350, E9351, E9352, E9401, 96500, 96501, 96502, 96509,  9701, E9500, E8501, E8502 | F11.10, F11.120, F11.121, F11.122, F11.129, F11.14, F11.150,  F11.151, F11.159, F11.181, F11.182, F11.188, F11.19, F11.20,  F11.21, F11.220, F11.221, F11.222, F11.229, F11.23, F11.24,  F11.250, F11.251, F11.252, F11.259, F11.281, F11.282, F11.288,  F11.29, F11.90, F11.920, F11.921, F11.922, F11.929, F11.93,  F11.94, F11.950, F11.951, F11.959, F11.981, F11.982, F11.988,  F11.99, T40.0X1A, T40.0X1D, T40.0X2A, T40.0X2D, T40.0X3A, T40.0X3D, T40.0X4A, T40.0X4D, T40.1X1A, T40.1X1D, T40.1X2A, T40.1X2D, T40.1X3A, T40.1X3D, T40.1X4A, T40.1X4D, T40.2X1A, T40.2X1D, T40.2X2A, T40.2X2D, T40.2X3A, T40.2X3D, T40.2X4A, T40.2X4D, T40.3X1A, T40.3X1D, T40.3X2A, T40.3X2D, T40.3X3A, T40.3X3D, T40.3X4A, T40.3X4D, T40.4X1A, T40.4X1D, T40.4X2A, T40.4X2D, T40.4X3A, T40.4X3D, T40.4X4A, T40.4X4D, T40.601A,  T40.601D, T40.602A, T40.602D, T40.603A, T40.603D, T40.604A, T40.604D, T40.691A, T40.691D, T40.692A, T40.692D, T40.693A, T40.693D, T40.694A, T40.694D, T40.0X5A, T40.0X5D, T40.2X5A, T40.2X5D, T40.3X5A, T40.3X5D, T40.4X5A, T40.4X5D, T40.605A, T40.695A, T40.695D, Z79.891 |

# **Supplementary Table 2:** ICD codes for other SUD diagnoses

| Disease | | ICD-9-CM | ICD-10-CM |
| --- | --- | --- | --- |
| Alcohol-Related Disorders | 291.0, 291.1, 291.2, 291.3, 291.4, 291.5, 291.81, 291.82, 291.89, 291.9, 303.00, 303.01, 303.02, 303.03, 303.90, 303.91, 303.92, 303.93, 305.00, 305.01, 305.02, 305.03, 980.0, 980.1, 980.2, 980.8, 980.9 | | F10.1, F10.10, F10.11, F10.12, F10.120, F10.121, F10.129, F10.13, F10.130, F10.131, F10.132, F10.139, F10.14, F10.15, F10.150, F10.151, F10.159, F10.18, F10.180, F10.181, F10.182, F10.188, F10.19, F10.2, F10.20, F10.21, F10.22, F10.220, F10.221, F10.229, F10.23, F10.230, F10.231, F10.232, F10.239, F10.24, F10.25, F10.250, F10.251, F10.259, F10.26, F10.27, F10.28, F10.280, F10.281, F10.282, F10.288, F10.29, F10.9, F10.2, F10.920, F10.921, F10.929, F10.93, F10.930, F10.931, F10.932, F10.939, F10.94, F10.95, F10.950, F10.951, F10.959, F10.96, F10.97, F10.98, F10.980, F10.981, F10.982, F10.988, F10.99 |
| Cannabis-Related Disorders | 304.30, 305.2, 305.20, 305.21, 305.22, 305.23 | | F12.1, F12.10, F12.11, F12.12, F12.120, F12.121, F12.122, F12.129, F12.13, F12.15, F12.150, F12.151, F12.159, F12.18, F12.180, F12.188, F12.19, F12.2, F12.20, F12.21, F12.22, F12.220, F12.221, F12.222, F12.229, F12.23, F12.25, F12.250, F12.252, F12.259, F12.28, F12.280, F12.288, F12.29, F12.9, F12.90, F12.92, F12.920, F12.921, F12.922, F12.929, F12.93, F12.95, F12.950, F12.951, F12.959, F12.98, F12.980, F12.988, F12.99 |
| Stimulant-Related Disorders | 304.2, 304.20, 304.21, 304.22, 304.23, 304.4, 304.40, 304.41, 304.42, 304.43, 305.6, 305.60, 305.61, 305.62, 305.63, 305.7, 305.70, 305.71, 305.72, 305.73 | | F14.10, F14.11, F14.12, F14.120, F14.121, F14.122, F14.129, F14.13, F14.14, F14.15, F14.150, F14.151, F14.159, F14.18, F14.180, F14.181, F14.182, F14.188, F14.19, F14.2, F14.20, F14.21, F14.22, F14.220, F14.221, F14.222, F14.229, F14.23, F14.24, F14.25, F14.250, F14.219, F14.259, F14.28, F14.280, F14.281, F14.282, F14.288, F14.29, F14.9, F14.90, F14.92, F14.920, F14.921, F14.922, F14.929, F14.93, F14.94, F14.95, F14.950, F14.951, F14.959, F14.98, F14.980, F14.981, F14.982, F14.988, F14.99, F15.1, F15.10, F15.11, F15.12, F15.120, F15.121, F15.122, F15.129, F15.13, F15.14, F15.15, F15.150, F15.151, F15.159, F15.18, F15.180, F15.181, F15.182, F15.188, F15.19, F15.2, F15.20, F15.21, F15.22, F15.220, F15.221, F15.222, F15.229, F15.23, F15.24, F15.25, F15.250, F15.251, F15.259, F15.28, F15.280, F15.281, F15.282, F15.288, F15.9, F15.90, F15.92, F15.920, F15.921, F15.922, F15.929, F15.93, F15.94, F15.95, F15.950, F15.951, F15.959, F15.98, F15.980, F15.981, F15.982, F15.988, F15.99 |
| Sedative-, Hypnotic-, or Anxiolytic-Related Disorders | 304.1, 304.10, 304.11, 304.12, 304.13, 305.40 | | F13.1, F13.10, F13.11, F13.12, F13.120, F13.121, F13.129, F13.13, F13.130, F13.131, F13.132, F13.139, F13.14, F13.15, F13.150, F13.151, F13.159, F13.18, F13.180, F13.181, F13.182, F13.188, F13.19, F13.2, F13.20, F13.21, F13.22, F13.220, F13.221, F13.229, F13.23, F13.230, F13.231, F13.232, F13.239, F13.24, F13.25, F13.250, F13.251, F13.259, F13.26, F13.27, F13.28, F13.280, F13.281, F13.282, F13.288, F13.29, F13.9, F13.90, F13.92, F13.920, F13.921, F13.929, F13.93, F13.930, F13.931, F13.932, F13.939, F13.94, F13.95, F13.950, F13.951, F13.959, F13.96, F13.97, F13.98, F13.980, F13.981, F13.982, F13.988, F13.99 |
| Hallucinogen-Related Disorders | 304.50, 304.51, 304.52, 304.53, 305.30, 305.31, 305.32, 305.33 | | F16.1, F16.10, F16.11, F16.12, F16.120, F16.121, F16.122, F16.129, F16.14, F16.15, F16.150, F16.151, F16.159, F16.18, F16.180, F16.183, F16.188, F16.19, F16.2, F16.20, F16.21, F16.22, F16.220, F16.221, F16.229, F16.24, F16.25, F16.250, F16.251, F16.259, F16.28, F16.280, F16.283, F16.288, F16.29, F16.9, F16.90, F16.92, F16.920, F16.921, F16.929, F16.94, F16.95, F16.950, F16.951, F16.959, F16.98, F16.980, F16.983, F16.988, F16.99 |
| Inhalant-Related Disorders |  | | F18.1, F18.10, F18.11, F18.12, F18.120, F18.121, F18.129, F18.14, F18.15, F18.150, F18.151, F18.159, F18.17, F18.18, F18.180, F18.188, F18.19, F18.2, F18.20, F18.21, F18.22, F18.220, F18.221, F18.229, F18.24, F18.25, F18.250, F18.251, F18.259, F18.27, F18.28, F18.280, F18.288, F18.29, F18.9, F18.90, F18.92, F18.920, F18.921, F18.929, F18.94, F18.95, F18.950, F18.951, F18.959, F18.97, F18.98, F18.980, F18.988, F18.99 |

# **Supplementary Table 3:** ICD codes for other mental health diagnoses

| comorbidity | ICD-9-CM & ICD-10-CM codes |
| --- | --- |
| Anxiety | 300.00, 300.01, 300.02, 300.09, F300.10, F300.11, F300.12, F300.13, F300.14, F300.15, F300.16, F300.19, 300.20, 300.21, 300.22, 300.23, 300.29  F300.3, F300.4, F300.5, F300.6, F300.7, F300.81, F300.82, F300.89, F300.9, F40.00, F40.01, F40.02, F40.10, F40.11, F40.210, F40.218, F40.220, F40.228, F40.230, F40.231, F40.232, F40.233, F40.240, F40.241, F40.242, F40.243, F40.248, F40.290, F40.291, F40.298, F40.8, F40.9, F41.0, F41.1, F41.3, F41.8, F41.9 |
| ADHD | 314.00, 314.01  F90.0, F90.1, F90.2, F90.8, F90.9 |
| Bipolar | 296.0, 296.1, 296.40, 296.41, 296.42, 296.43, 296.44, 296.45, 296.46, 296.50, 296.51, 296.52, 296.53, 296.54, 296.55, 296.56, 296.60, 296.61, 296.62, 296.63, 296.64, 296.65, 296.66, 296.7, 296.80, 296.81, 296.89,  F31.0, F31.10, F31.11, F31.12, F31.13, F31.2, F31.30, F31.31, F31.32, F31.4, F31.5, F31.60, F31.61, F31.62, F31.63, F31.64, F31.70, F31.71, F31.72, F31.73, F31.74, F31.75, F31.76, F31.77, F31.78, F31.81, F31.89, F31.9 |
| MDD | 296.20, 296.21, 296.22, 296.23, 296.24, 296.25, 296.26, 296.30, 296.31, 296.32, 296.33, 296.34, 296.35, 296.36, 311,  F32.0, F32.1, F32.2, F32.3, F32.4, F32.5, F32.81, F32.89, F32.9, F33.0, F33.1, F33.2, F33.3, F33.40, F33.41, F33.42, F33.8, F33.9, F34.0, F34.1, F34.81, F34.89, F34.9, F39 |
| Adjustment | 309.0, 309.1, 309.21, 309.22, 309.23, 309.24, 309.28, 309.29, 309.3, 309.4, 309.82, 309.83, 309.89, 309.9,  F43.20, F43.21, F43.22, F43.23, F43.24, F43.25, F43.29, F43.8, F43.9 |
| Conduct | 312.00, 312.01, 312.02, 312.03, 312.10, 312.11, 312.12, 312.13, 312.20, 312.21, 312.22, 312.23, 312.30, 312.31, 312.32, 312.33, 312.34, 312.35, 312.39, 312.4, 312.81, 312.82,  312.89, 312.9,  F91.0, F91.1, F91.2, F91.3, F91.8, F91.9, F93.0, F93.8, F93.9, F94.0, F94.1, F94.2, F94.8, F94.9, F95.0, F95.1, F95.2, F95.8, F95.9, F98.0, F98.1, F98.21, F98.29, F98.3, F98.4, F98.5, F98.8, F98.9 |
| Schizophrenia | 294.20, 295.00, 295.01, 295.02, 295.03, 295.04, 295.05, 295.10, 295.11, 295.12, 295.13, 295.14, 295.15, 295.20, 295.21, 295.22, 295.23, 295.24, 295.25, 295.30, 295.31, 295.32, 295.33, 295.34, 295.35, 295.40, 295.41, 295.42, 295.43, 295.44, 295.45, 295.50, 295.51, 295.52, 295.53, 295.54, 295.55, 295.60, 295.61, 295.62, 295.63, 295.64, 295.65,  295.70, 295.71, 295.72, 295.73, 295.74, 295.75, 295.80, 295.81, 295.82, 295.83, 295.84, 295.85, 295.90, 295.91, 295.92, 295.93, 295.94, 295.95, 298.9, 299.80, 299.81, 299.90, 299.91,  F20.0, F20.1, F20.2, F20.3, F20.5, F20.81, F20.89, F20.9, F21, F23, F25.0, F25.1, F25.8, F25.9, F28, F29, F32.89, F84.5 |
| Personality Disorder | 300.14, 301.0, 301.10, 301.11, 301.12, 301.13, 301.20, 301.21, 301.22, 301.3, 301.4, 301.50, 301.51, 301.59, 301.6, 301.7, 301.81, 301.82, 301.83, 301.84, 301.89, 301.9,  301.10, 302.9, 310.1,F07.0, F34.0, F34.1, F44.81, F60.0, F60.1, F60.2, F60.3, F60.4, F60.5, F60.6, F60.7, F60.81, F60.89, F60.9, Z73.1 |
| PTSD | 300.9, 308.3, 309.81,  F43.10, F43.11, F43.12 |
| Pervasive Developmental Disorders | 299.00, 299.01, 299.10, 299.11, 299.80, 299.81, 299.90, 299.91, 315.00, 315.01, 315.02, 315.09, 315.1, 315.2, 315.31, 315.32, 315.34, 315.35, 315.39, 315.4, 315.5, 315.8, 315.9,  317, 318.0, 318.1, 318.2, 319,  F80.0, F80.1, F80.2, F80.4, F80.81, F80.82, F80.89, F80.9, F81.0, F81.2, F81.81, F81.89, F81.9, F82, F84.0, F84.2, F84.3, F84.5, F84.8, F84.9, F88, F89 |

# **Supplementary Table 4:** Drug categorization

| Drug Type | Drug Names |
| --- | --- |
| Non-psychotropic | almotriptan, Butorphanol, dextropropoxyphene, Diflunisal, dihydrocodeine, Dihydroergotamine, eletriptan, erenumab, Ergotamine, Fentanyl, frovatriptan, galcanezumab, Hydromorphone, Levorphanol, Meperidine, Methadone, Methoxyflurane, Methysergide, Morphine, Nalbuphine, naratriptan, Oxycodone, Oxymorphone, paracetamol, Pentazocine, pethidine, phenazone, Propoxyphene, rizatriptan, salicylamide, Salsalate, Sumatriptan, tapentadol, Tramadol, ziconotide, zolmitriptan, alfaxalone, Articaine, Benzocaine, Bupivacaine, chloroprocaine, Cocaine, dyclonine, Ethyl Chloride, Halothane, Isoflurane, Mepivacaine, Prilocaine, Propofol, ropivacaine, sevoflurane, Amantadine, Benztropine, Biperiden, Bromocriptine, entacapone, Levodopa, Pergolide, Pramipexole, Procyclidine, ropinirole, Rotigotine, Selegiline, tolcapone, Trihexyphenidyl, Brivaracetam, Ethosuximide, eslicarbazepine, felbamate, fosphenytoin, lacosamide, Mephenytoin, mesuximide, phenobarbital, Phenytoin, Primidone, rufinamide, tiagabine, Trimethadione, Vigabatrin, zonisamide, Ambenonium, Betahistine, Bethanechol, Carbachol, cevimeline, fampridine, L-methylfolate, Neostigmine, Pilocarpine, Pyridostigmine, Riluzole, Tetrabenazine, valbenazine, valerian |
| Psychotropic | Donepezil, Galantamine, Memantine, rivastigmine, Tacrine, Cannabidiol, Clonidine, Carbamazepine, Clonazepam, gabapentin, lamotrigine, pregabalin, oxcarbazepine, Valproate, Amitriptyline, Amoxapine, Bupropion, Citalopram, Clomipramine, Desipramine, Desvenlafaxine, dosulepin, Doxepin, duloxetine, Escitalopram, esketamine, Fluoxetine, Fluvoxamine, Imipramine, Iprindole, Isocarboxazid, Ketamine, levomilnacipran, Maprotiline, Mianserin, milnacipran, Mirtazapine, nefazodone, Nortriptyline, Paroxetine, Phenelzine, Protriptyline, reboxetine, Sertraline, Tranylcypromine, Trazodone, Trimipramine, Tryptophan, topiramate, venlafaxine, vilazodone, Vortioxetine, Amisulpride, aripiprazole, Asenapine, brexpiprazole, cariprazine, Chlorpromazine, Clozapine, Droperidol, Fluphenazine, Haloperidol, iloperidone, Lithium, Loxapine, lurasidone, Mesoridazine, Molindone, olanzapine, paliperidone, Perphenazine, pimavanserin, Pimozide, Prochlorperazine, Promazine, quetiapine, Risperidone, Sulpiride, Thioridazine, Thiothixene, tiotixene, Trifluoperazine, ziprasidone, Zuclopenthixol, Alprazolam, Buspirone, Chlordiazepoxide, clobazam, clorazepate, Diazepam, halazepam, Hydroxyzine, Lorazepam, Meprobamate, Oxazepam, Prazepam, Amobarbital, butabarbital, clomethiazole, Dexmedetomidine, Dichloralphenazone, Estazolam, Eszopiclone, Ethchlorvynol, Flurazepam, Melatonin, Midazolam, Paraldehyde, quazepam, Ramelteon, suvorexant, tasimelteon, Temazepam, Thiopental, Triazolam, zaleplon, zolpidem, zopiclone, amfetamine, Amphetamine, armodafinil, atomoxetine, Caffeine, dexamfetamine, dexmethylphenidate, Lisdexamfetamine, metamfetamine, Methamphetamine, Methylphenidate, modafinil, Pemoline, phendimetrazine, Solriamfetol, acamprosate, Disulfiram, nalmefene, Naltrexone, Nicotine, varenicline |

**Supplemental Figure 1:** Survival curves based on initial GAF and CGI-S scores for IP/IOP and OP groups


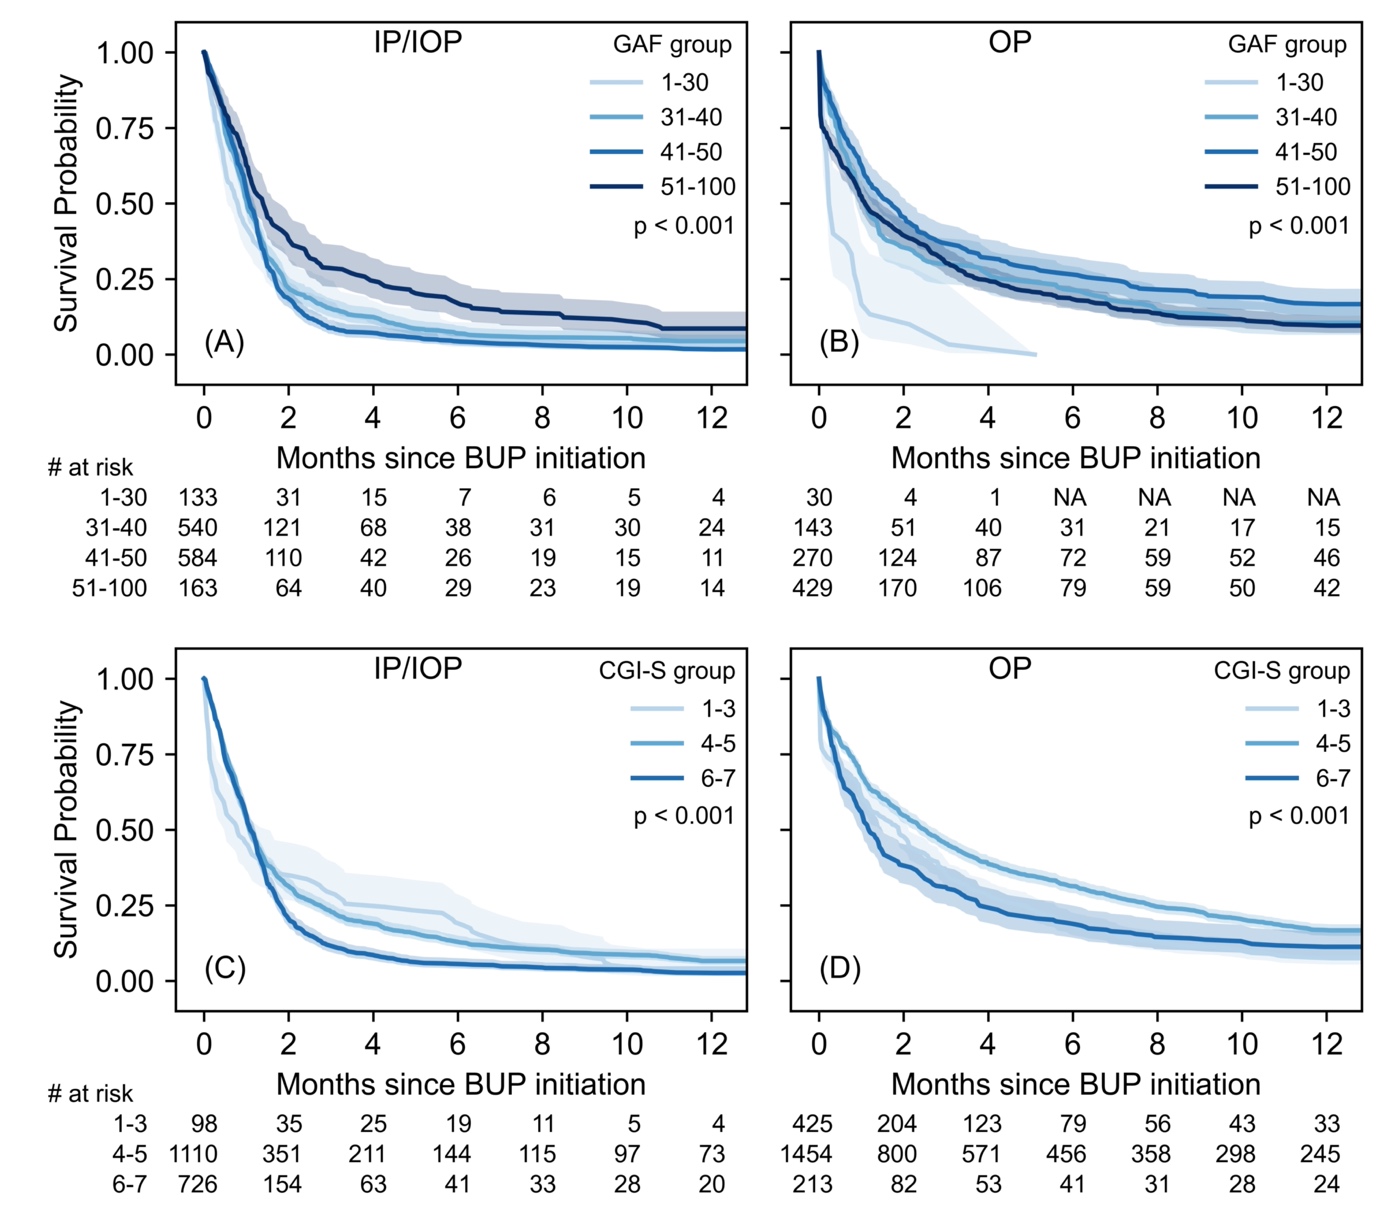


**Supplemental Figure 2:** Survival curves stratified by sex for IP/IOP and OP groups


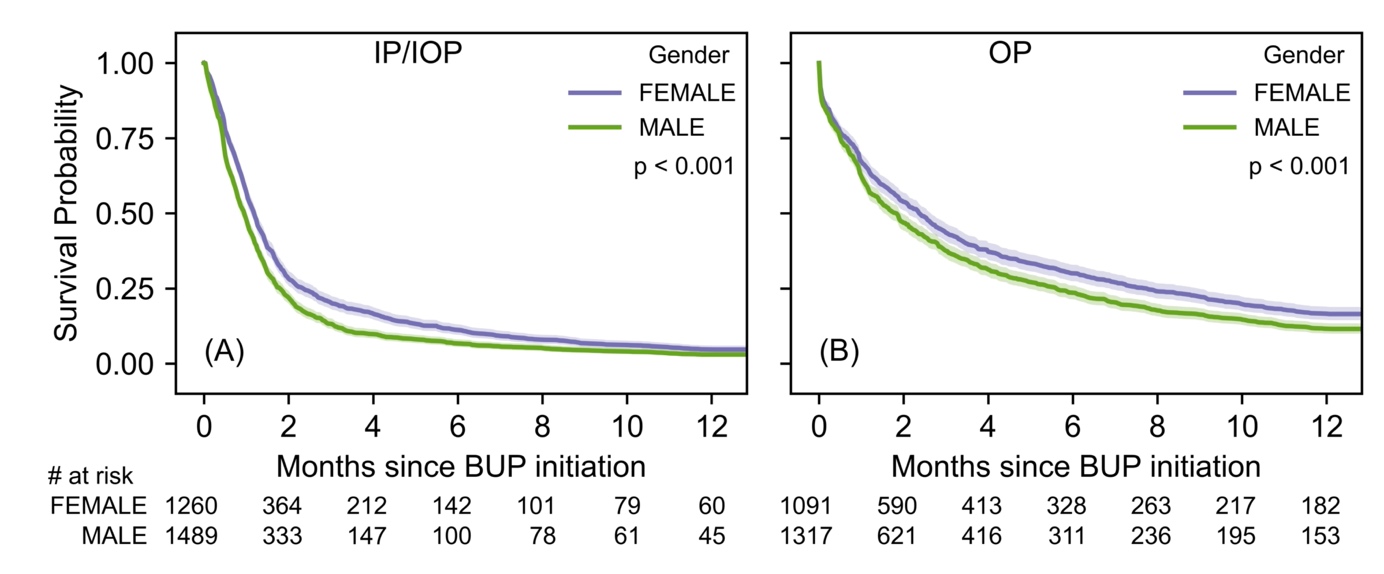


**Supplemental Figure 3:** Survival curves stratified by age group for IP/IOP and OP groups


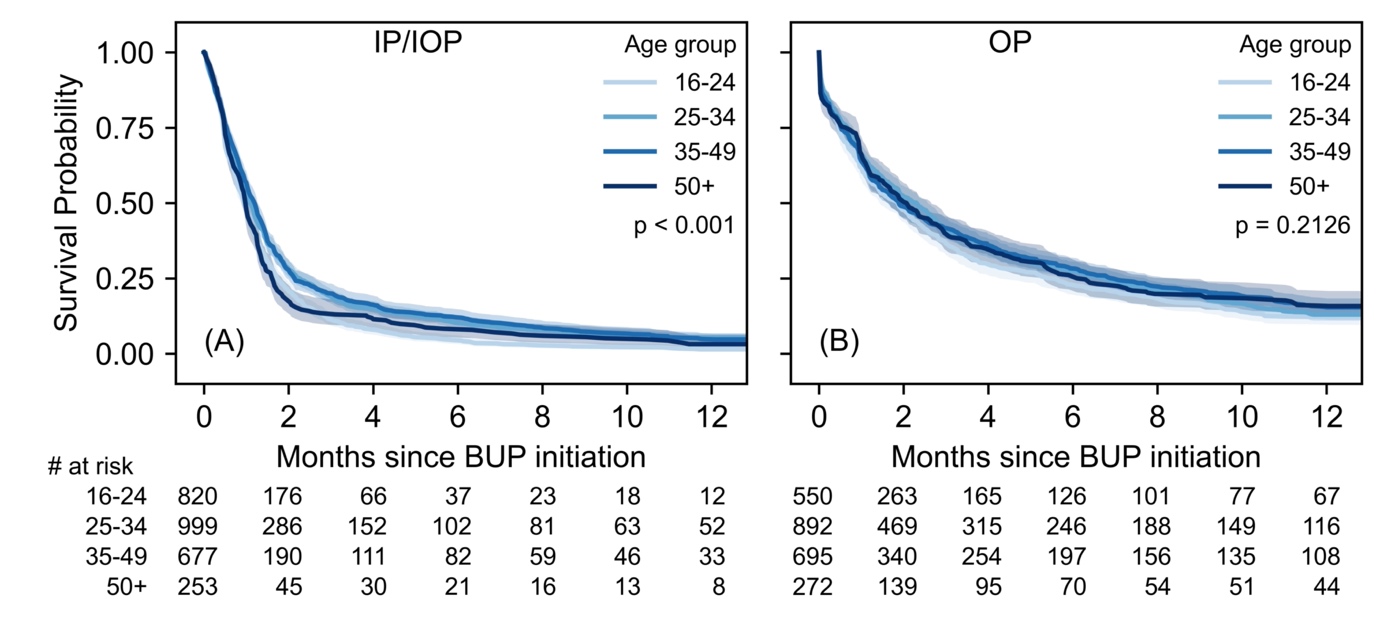


**Supplemental Figure 4:** Survival curves stratified by presence (1) or absence (0) of comorbid substance use (alcohol and stimulants) disorder for IP/IOP and OP groups


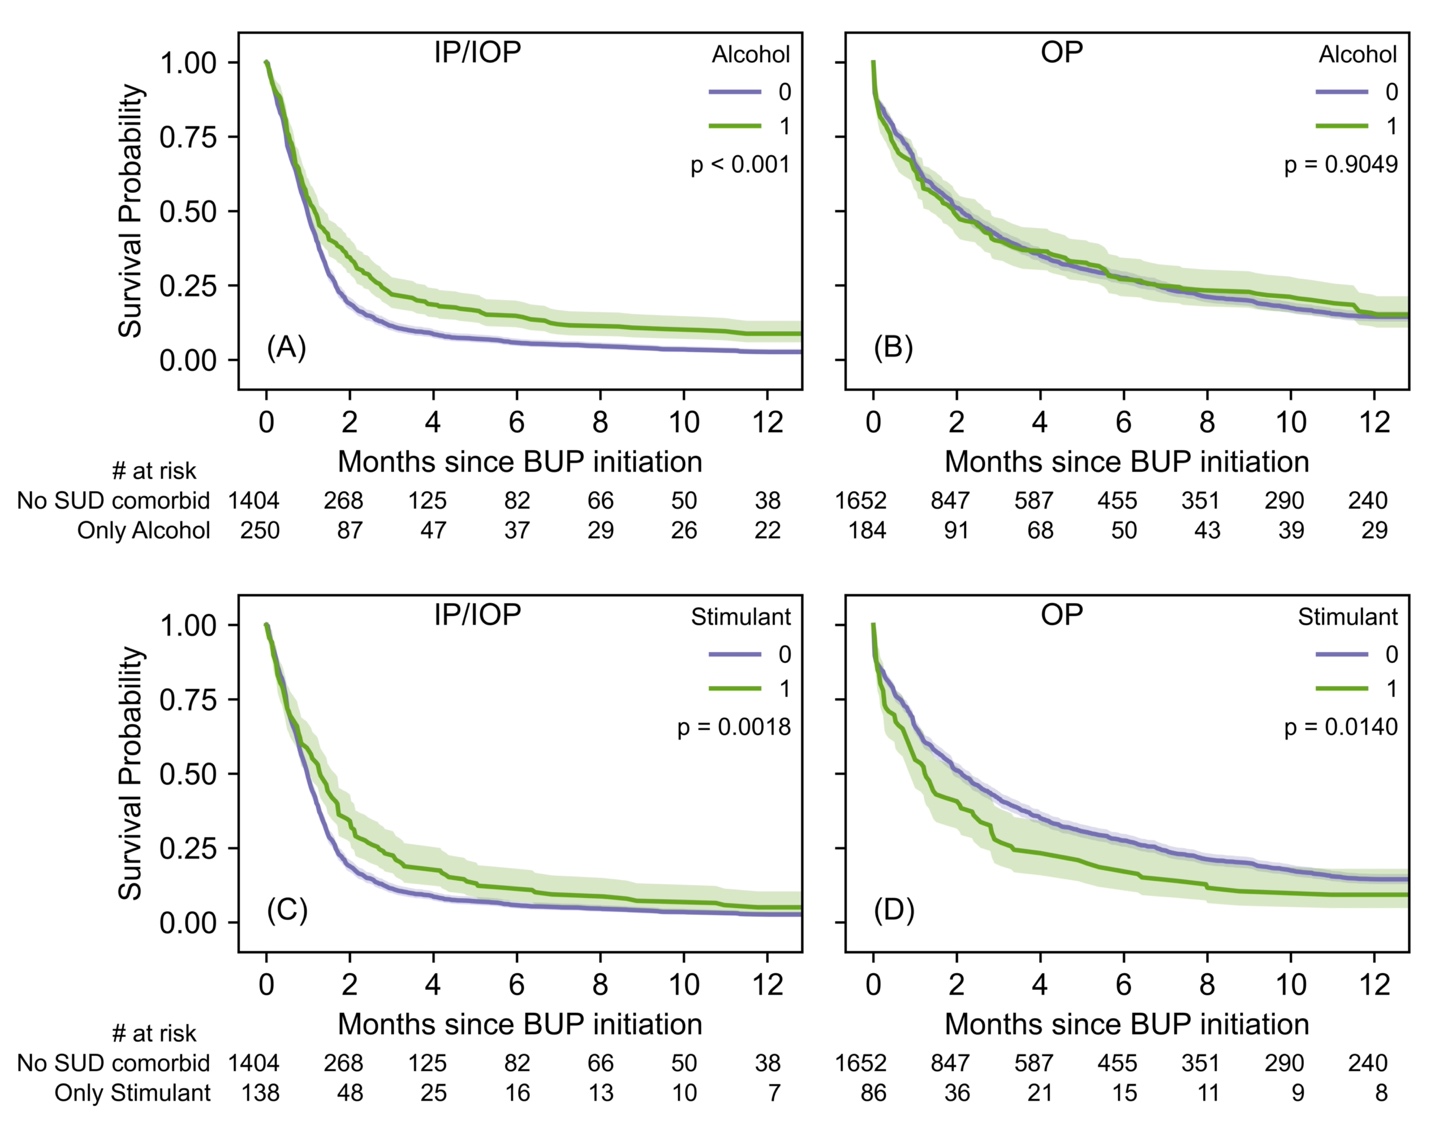


**Supplemental Figure 5:** Survival curves stratified by number of comorbid psychiatric disorders for IP/IOP and OP groups


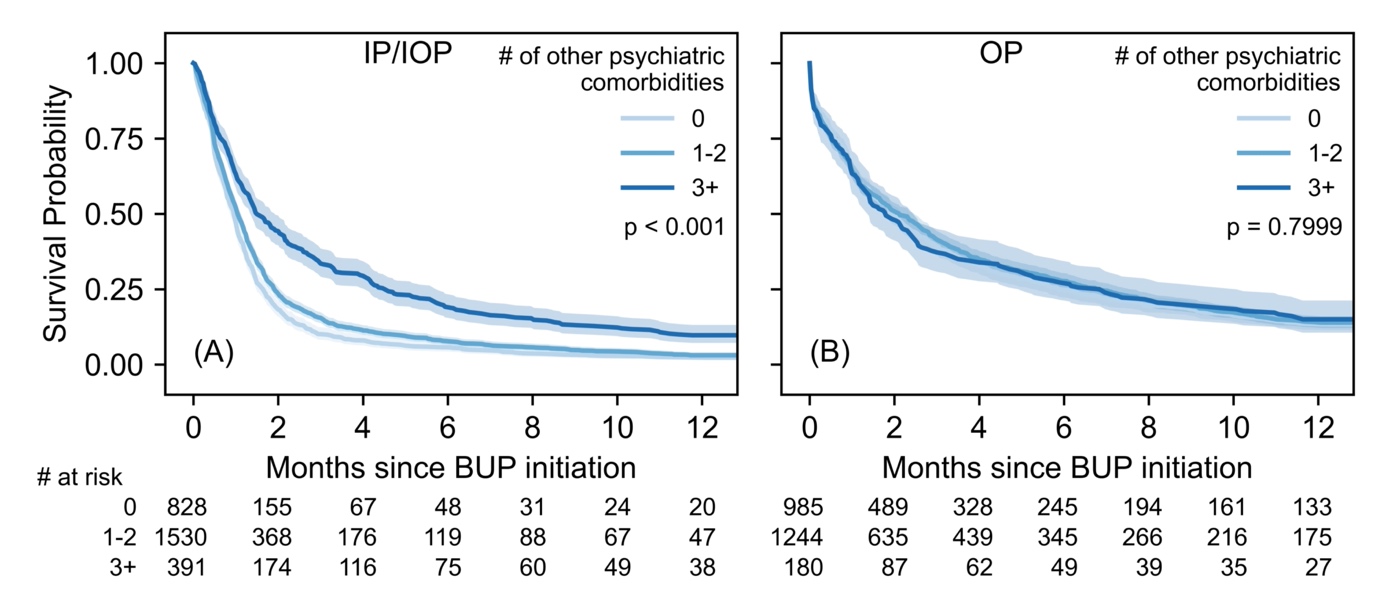


**Supplemental Figure 6:** Survival curves stratified by number of concomitant psychotropic and non-psychotropic drugs recorded in the electronic health record for IP/IOP and OP groups


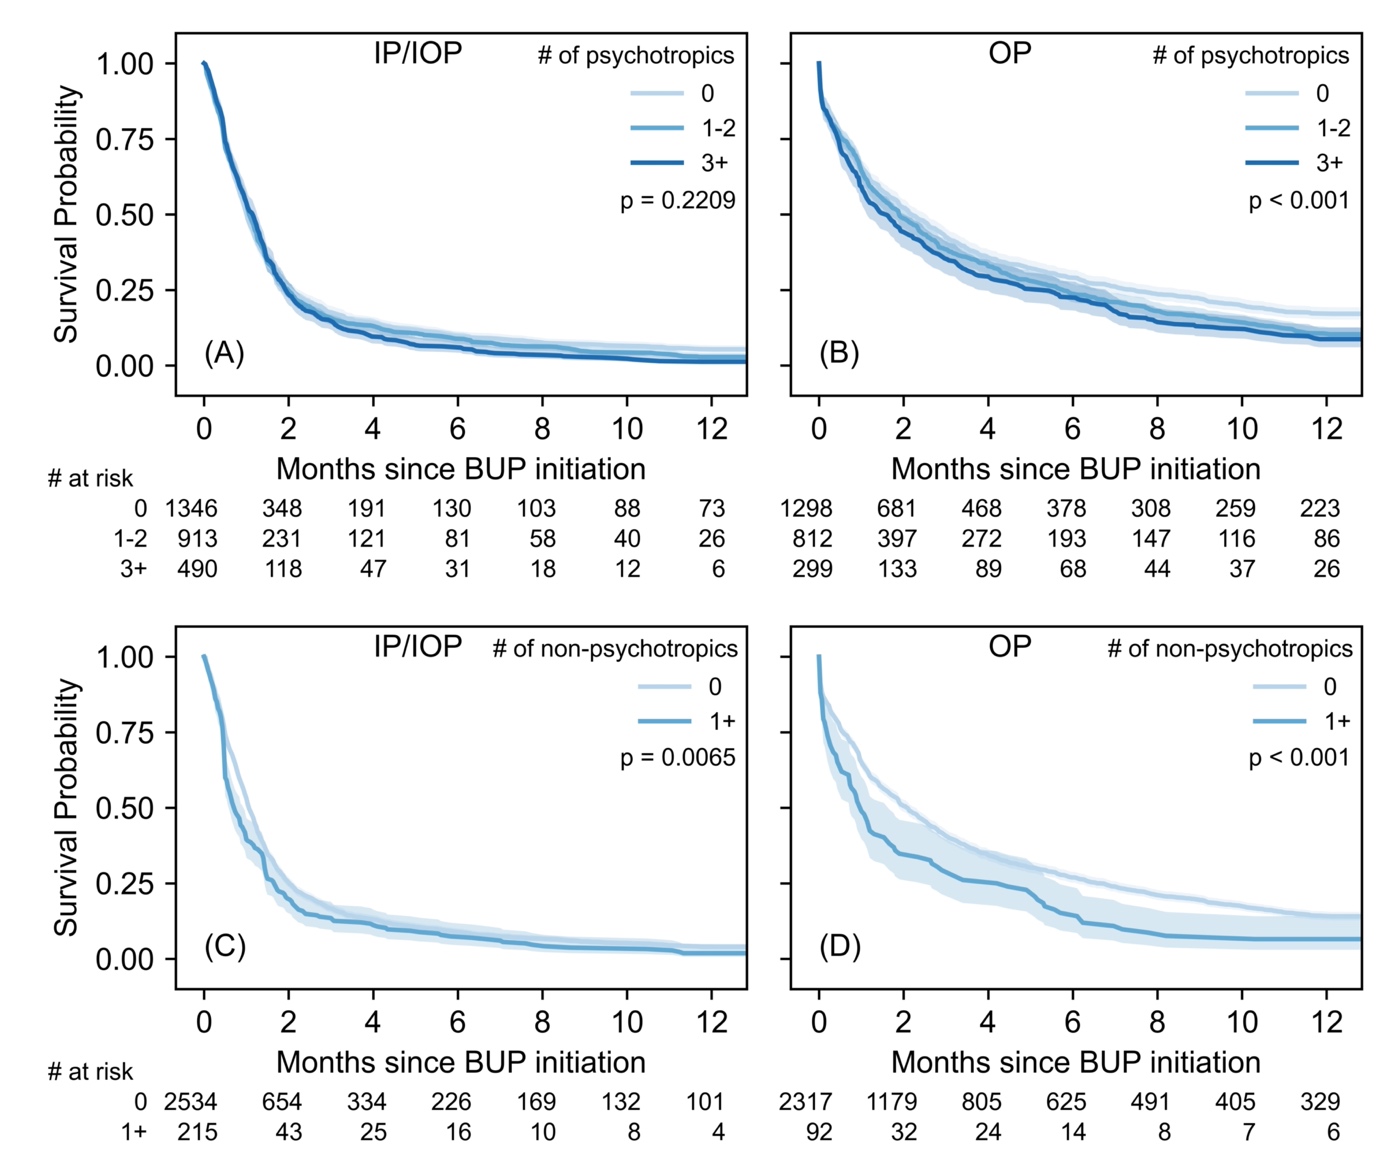


**Supplemental Figure 7:** Percentage of patients undergoing BUP dose changes for IP/IOP and OP groups


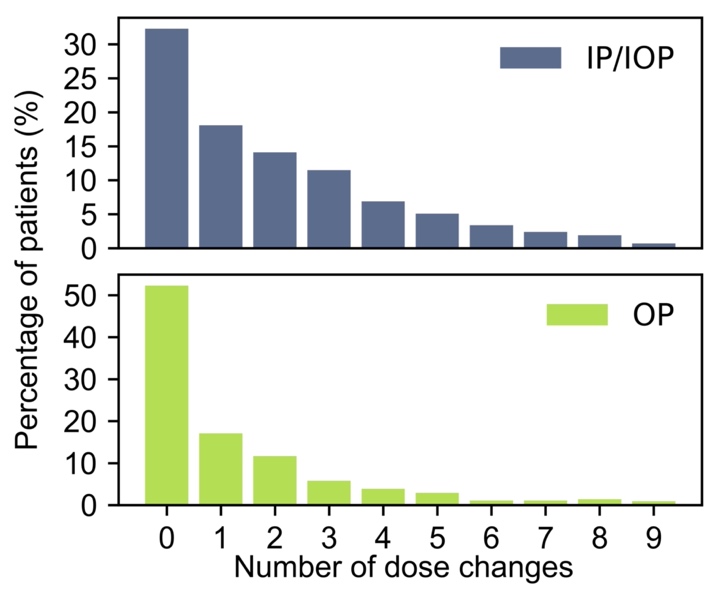

Supplement: Supplementary file 1 [file get_supplementary_file.php]
